# Supplementary material for: Comprehensive bioinformatics analysis of the E2F family in human clear cell renal cell carcinoma
Source: PubMed Central journal article supplement — Oncol Lett. 2022 Aug 19;24(4):351. doi: 10.3892/ol.2022.13471 (PMC9478613; doi:10.3892/ol.2022.13471), 2022-08-19
Supplement: Supplementary_Data.pdf [file Supplementary_Data.pdf]

Table SI. The clinical information of patients (n=10) in the present study.

| Number | Age | Sex    | pTNM Stage                                    | Grade stage |
|--------|-----|--------|-----------------------------------------------|-------------|
| 1      | 65  | male   | T <sub>1b</sub> N <sub>x</sub> M <sub>x</sub> | G1          |
| 2      | 56  | female | T <sub>1a</sub> N <sub>0</sub> M <sub>x</sub> | G1          |
| 3      | 62  | male   | T <sub>1a</sub> N <sub>x</sub> M <sub>x</sub> | G2          |
| 4      | 66  | female | T <sub>1b</sub> N <sub>x</sub> M <sub>x</sub> | G3          |
| 5      | 55  | male   | T <sub>1a</sub> N <sub>0</sub> M <sub>x</sub> | G1          |
| 6      | 68  | male   | T <sub>1b</sub> N <sub>x</sub> M <sub>x</sub> | G3          |
| 7      | 58  | male   | T <sub>1a</sub> N <sub>x</sub> M <sub>x</sub> | G2          |
| 8      | 62  | male   | T <sub>3a</sub> N <sub>0</sub> M <sub>x</sub> | G2          |
| 9      | 67  | female | T <sub>1b</sub> N <sub>x</sub> M <sub>x</sub> | G2          |
| 10     | 56  | male   | T <sub>1b</sub> N <sub>x</sub> M <sub>x</sub> | G1          |

Table SII. Primer sequences of E2F family.

| Primer name | Primer sequence (5' → 3')  |
|-------------|----------------------------|
| E2F1        | F: ACGCTATGAGACCTCACTGAA   |
|             | R: TCCTGGGTCAACCCCTCAAG    |
| E2F2        | F: CGTCCCTGAGTTCCCAACC     |
|             | R: GCGAAGTGTGCATACCGAGTCTT |
| E2F3        | F: AGAAAGCGGTCATCAGTACCT   |
|             | R: TGGACTTCGTAGTGCAGCTCT   |
| E2F4        | F: CACCACCAAGTTCGTGTCCC    |
|             | R: GCGTACAGCTAGGGTGTCA     |
| E2F5        | F: GGGCTGCTCACTACCAAGTTC   |
|             | R: CCTACACCTTTCCACTGGATACT |
| E2F6        | F: TCCATGAACAGATCGTCATTGC  |
|             | R: TCCGTTGGTGCTCCTTATGTG   |
| E2F7        | F: AGGCAGCCCAGACTAGATTTT   |
|             | R: GCTGGCAGCACTAATGAGCA    |
| E2F8        | F: CCTGAGATCCGCAACAGAGAT   |
|             | R: AGATGTCATTATTCACAGCAGGG |
| β-actin     | F: CTCCATCCTGGCCTCGCTGT    |
|             | R: GCTGTCACCTTCACCGTTCC    |
